# Supplementary material for: Surface functionalization of graphene quantum dots with small organic molecules from photoluminescence modulation to bioimaging applications: an experimental and theoretical investigation
Source: Royal Society of Chemistry journal article supplement (doi:10.1039/c3ra42066c), 2013-01-01
Supplement: c3ra42066c.pdf [file c3ra42066c.pdf]

## Electronic Supplementary Information

### Surface Functionalization of Graphene Quantum Dots with Small Organic Molecules from Photoluminescence Modulation to Bioimaging Applications: An Experimental and Theoretical Investigation

*Zhaosheng Qian, Juanjuan Ma, Xiaoyue Shan, Linxiang Shao, Jin Zhou, Jianrong Chen and*

*Hui Feng\**

College of Chemistry and Life Science, Zhejiang Normal University, Jinhua 321004, P. R. China

- 1. Figure S1.** The XPS spectrum of CQDs.
- 2. Figure S2.** The XPS spectrum of CQDs-EG.
- 3. Figure S3.** The XPS spectrum of CQDs-EDA.
- 4. Figure S4.** FR-IR spectra of P-GQDs, G-GQDs, DTG-GQDs, EDA-GQDs, PDA-GQDs, BDA-GQDs and EA-GQDs.
- 5. Figure S5.** Optimized structures of modelled polyaromatic compounds

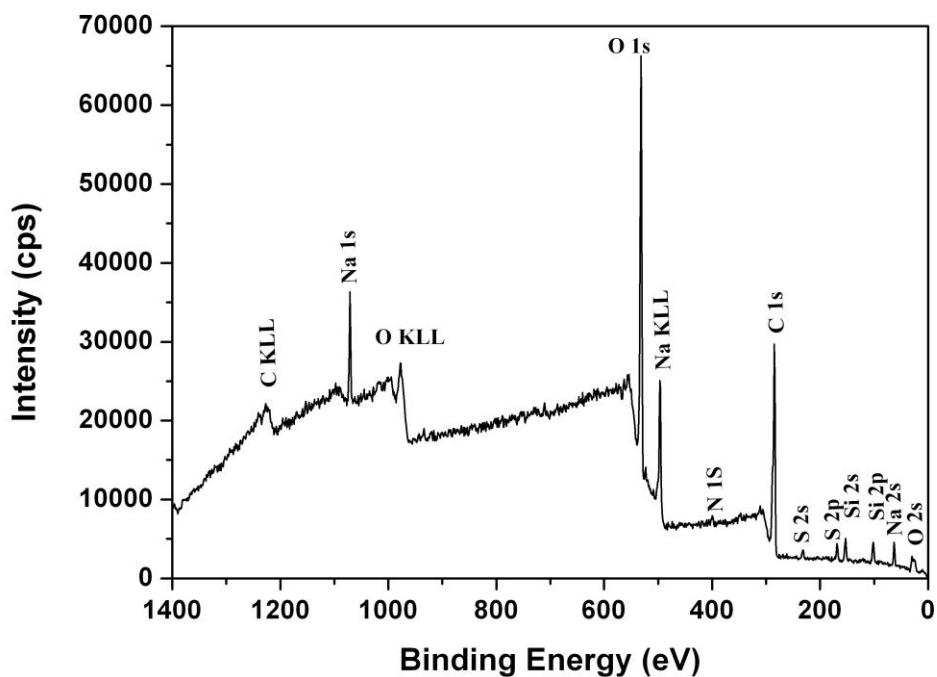

Figure S1. The XPS spectrum of CQDs.

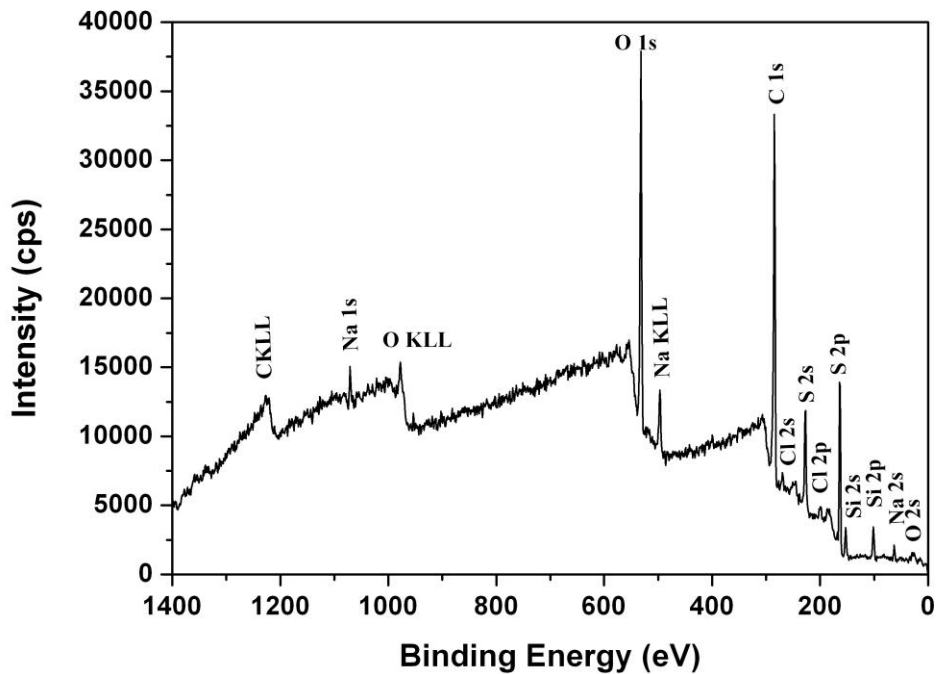

Figure S2. XPS spectrum of CQDs-EG.

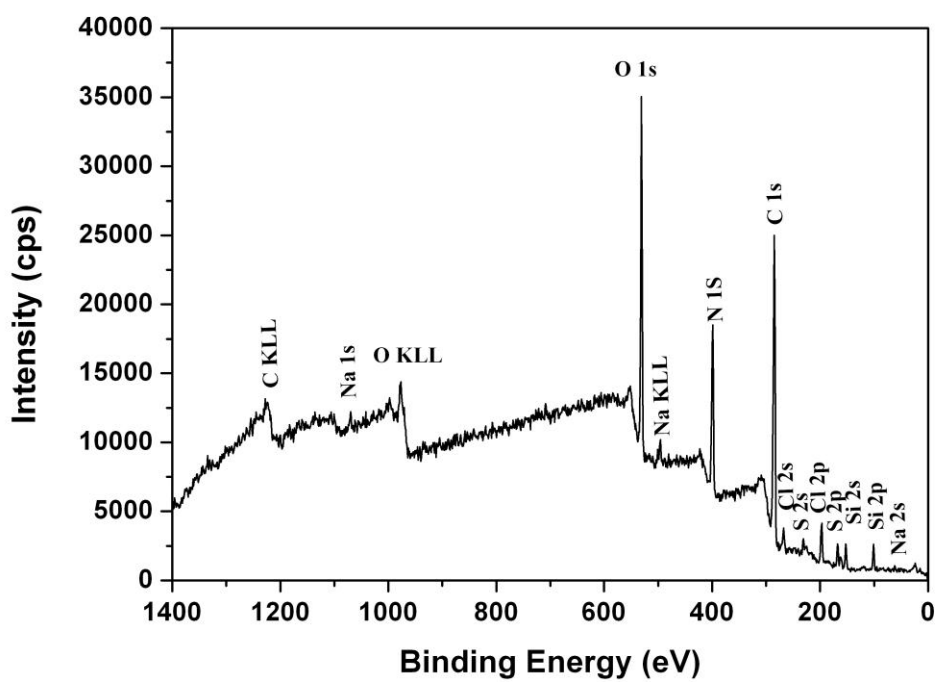

**Figure S3.** XPS spectrum of CQDs-EDA.

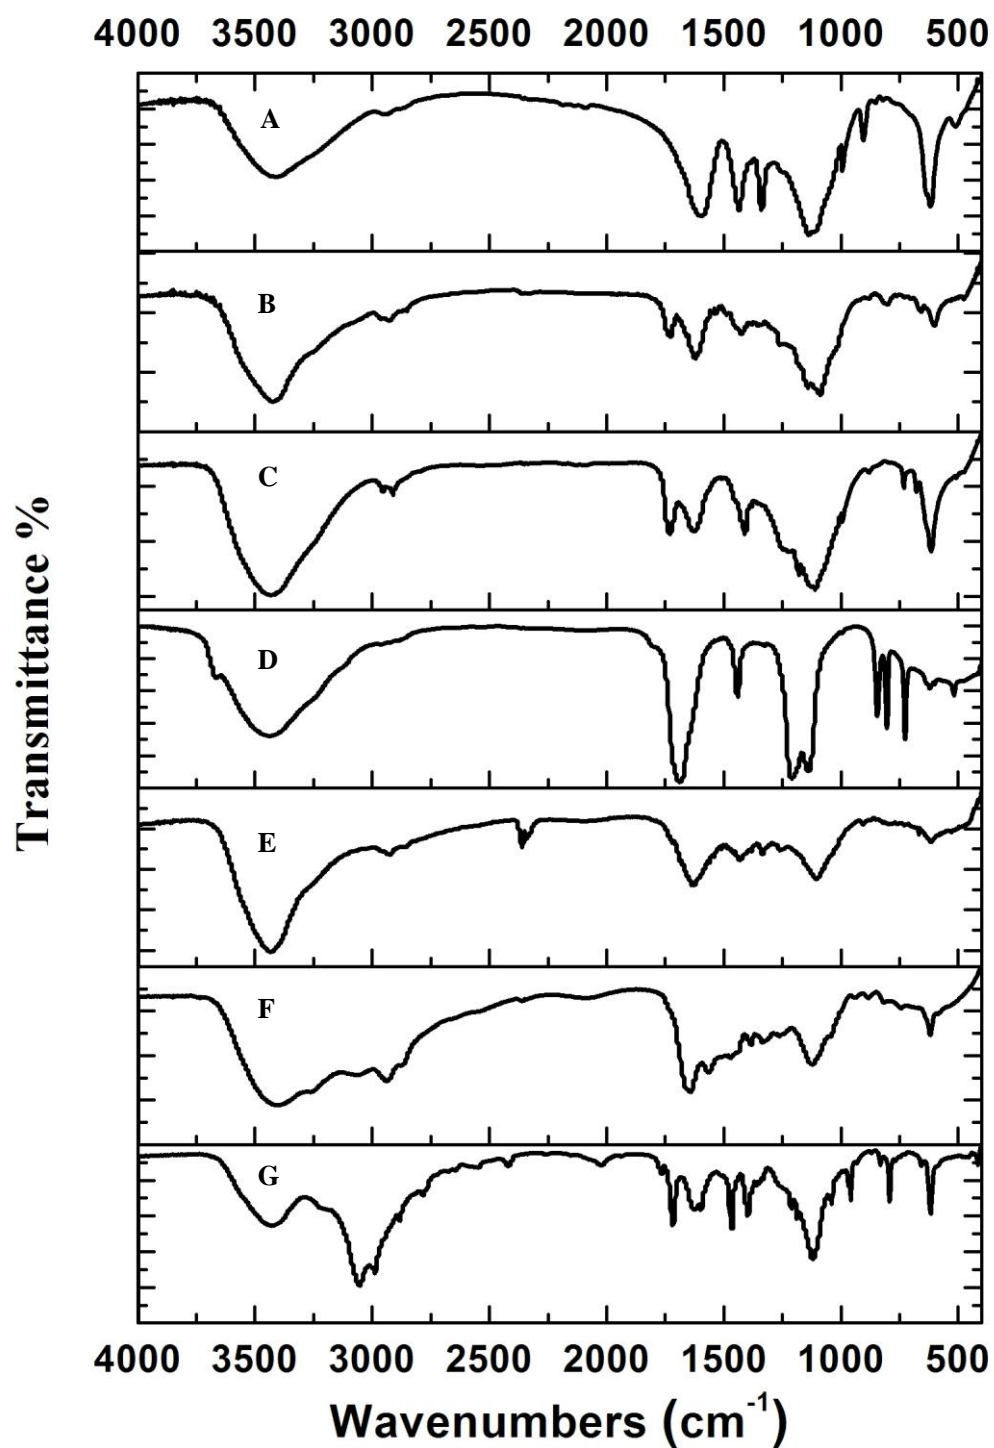

**Figure S4** FR-IR spectra of P-GQDs (A), G-GQDs (B), DTG-GQDs (C), EDA-GQDs (D), PDA-GQDs (E), BDA-GQDs (F) and EA-GQDs (G).

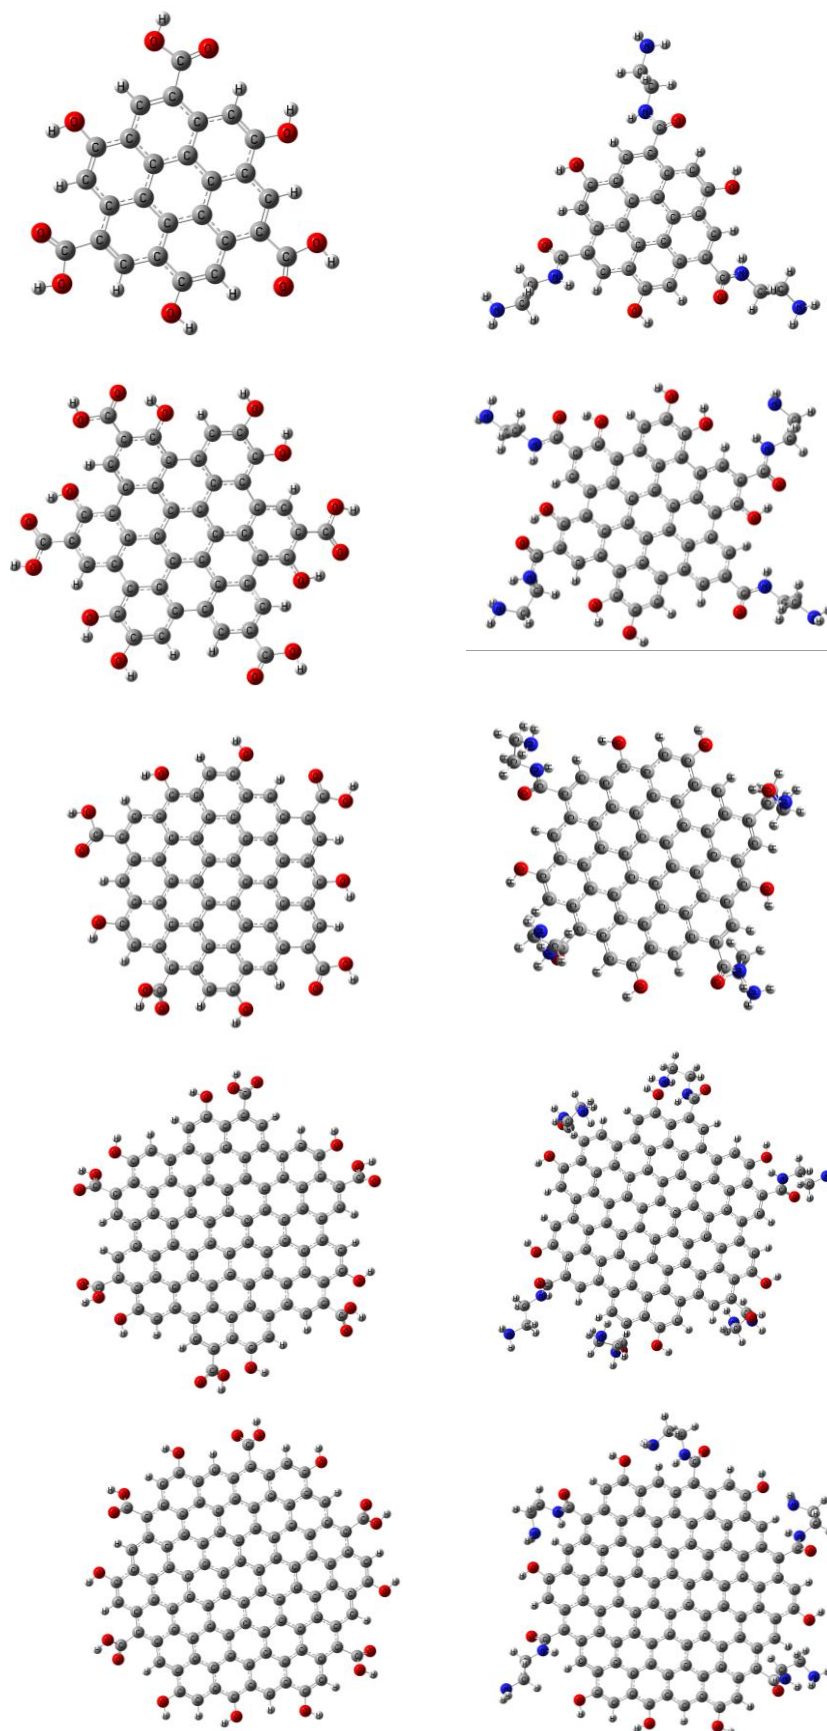

**Figure S5.** Optimized structures of modelled polyaromatic compounds
